# Supplementary material for: Folded-Light-Path Colloidal Quantum Dot Solar Cells
Source: PubMed Central journal article supplement — Sci Rep. 2013 Jul 9;3:2166. doi: 10.1038/srep02166 (PMC3705590; doi:10.1038/srep02166), 2013-07-09
Supplement: srep02166-s1.pdf [file srep02166-s1.pdf]

## Supplementary Information for

### Folded-Light-Path Colloidal Quantum Dot Solar Cells

Ghada Koleilat, Illan J. Kramer, Chris Wong, Susanna M. Thon, André J. Labelle, Sjoerd Hoogland, Edward H. Sargent

#### SI 1: Geometric Considerations

From Figure 1, the geometric relations are as follows:

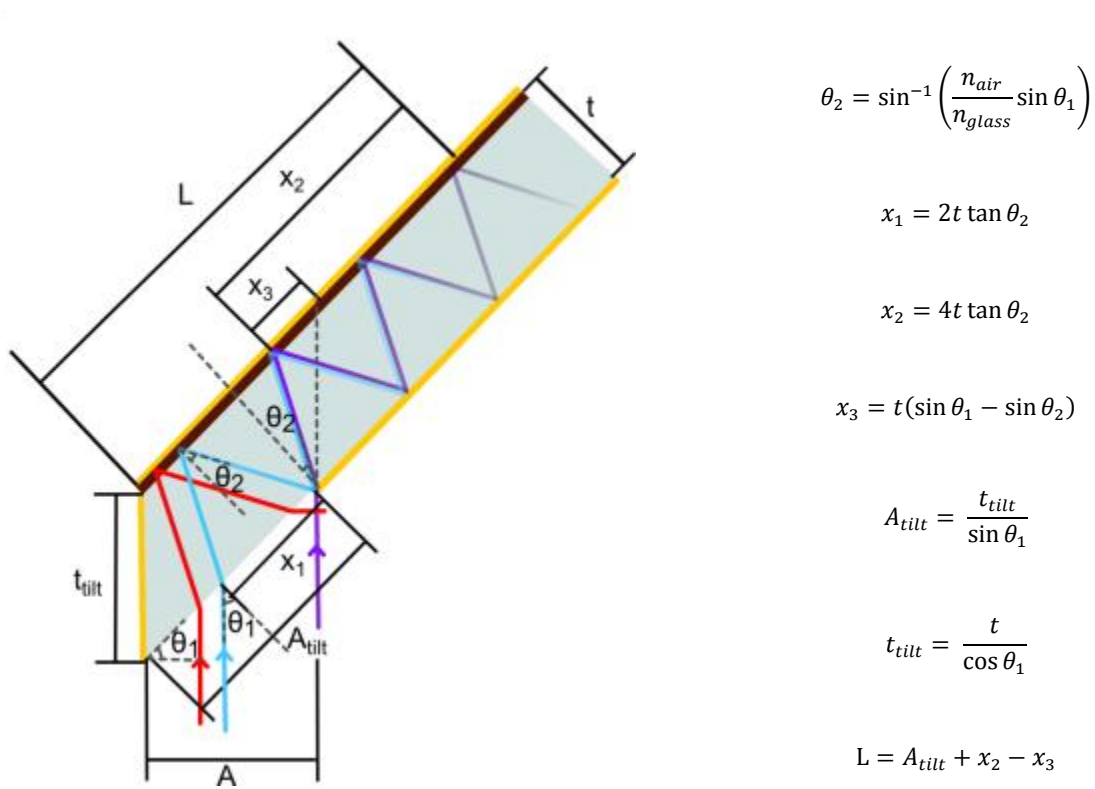

Figure SI 1-1: Same as Figure 1c from main text.

## SI 2: Evaporation Masks

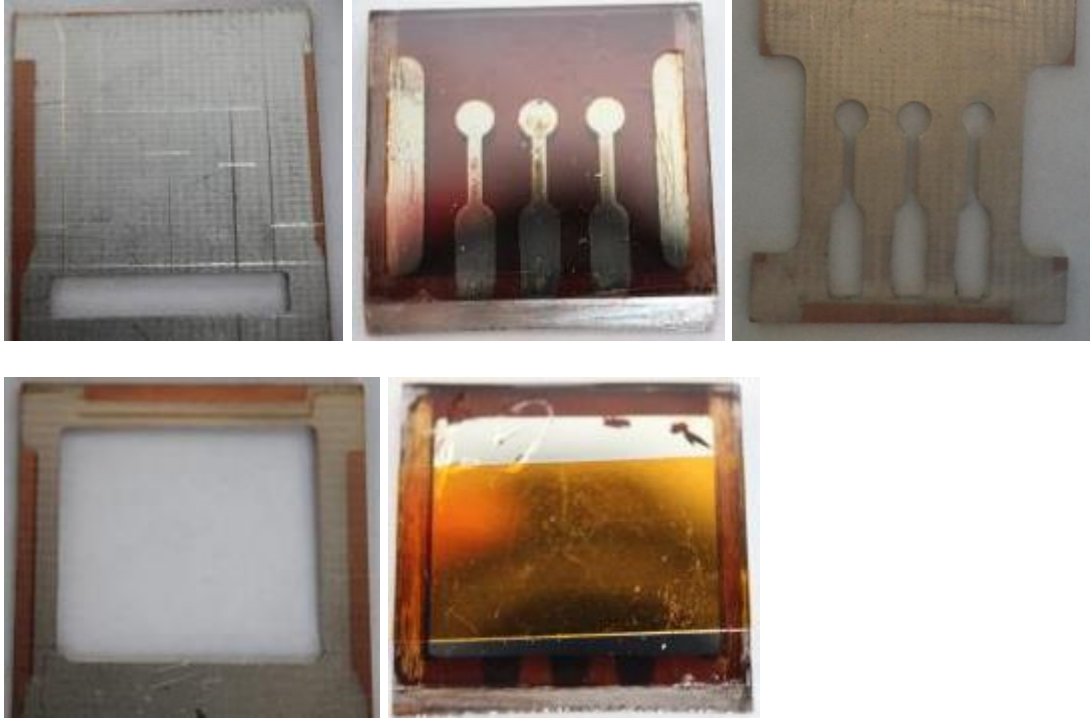

Figure SI 2-1: (top left) Edge mirror mask, (top middle) front of a finished device, (top right) top contact mask, (bottom left) back mirror mask and (bottom middle) back of a finished device with yellow tape to protect the metallic mirror during spin coating.

### SI 3: Internal Quantum Efficiency

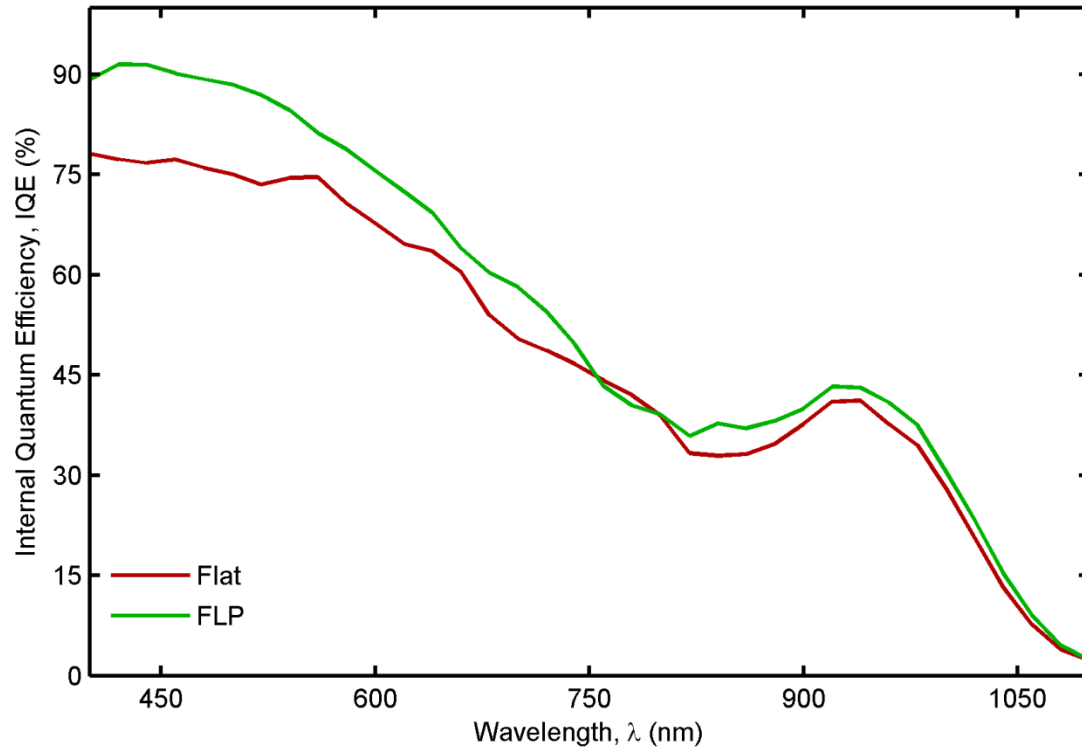

Figure SI 3-1: Internal quantum efficiency of flat and FLP devices. The EQE was taken from figure 3b and the absorption was taken as the total device absorption from figure 3a (solid curves).
